# Supplementary material
Source: publisher figshare collection journal article supplement (https://acs.figshare.com/ndownloader/files/3760582)
Supplement: Supplementary file 1 [file 3760582]

# **Supporting Information**

## **Preferential Stereocomplex Crystallization in Enantiomeric Blends of Cellulose Acetate-g-Poly(lactic acid)s with Comblike Topology**

Jianna Bao, Lili Han, Guorong Shan, Yongzhong Bao, Pengju Pan\*

*State Key Laboratory of Chemical Engineering, College of Chemical and Biological  
Engineering, Zhejiang University, 38 Zheda Road, Hangzhou 310027, China.*

\*Corresponding author. Tel.: +86-571-87951334; email: panpengju@zju.edu.cn

### **Measurement of Polarized Optical Microscopy (POM)**

Spherulitic morphology and spherulitic growth rate of PLLA/PDLA racemic blends were measured on a polarized optical microscopy (Eclipse E600 POL, Nikon Co., Tokyo, Japan). The sample was sandwiched between two glass slides and melted at 250 °C for 2 min on a Linkam THMS600 hot stage. In the melting process, the sample was slightly pressed to spread into a thin film (thickness ~ 50 μm). It was then fast cooled to the desired  $T_c$  at 100 °C/min for isothermal crystallization. During isothermal crystallization, spherulitic morphology was recorded by taking photo at a fixed time interval. Average radial growth rate ( $dR/dt$ ) was estimated from the slope of spherulitic radius ( $R$ ) vs crystallization time ( $t$ ) plot.

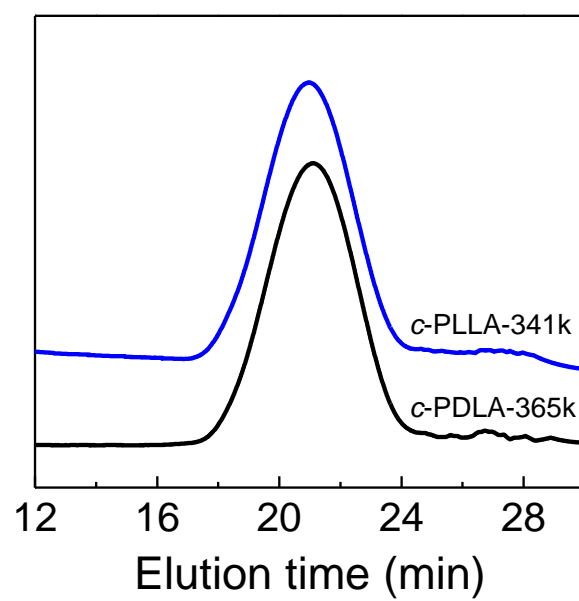

**Figure S1.** GPC traces of comblike PLLA and PDLA.

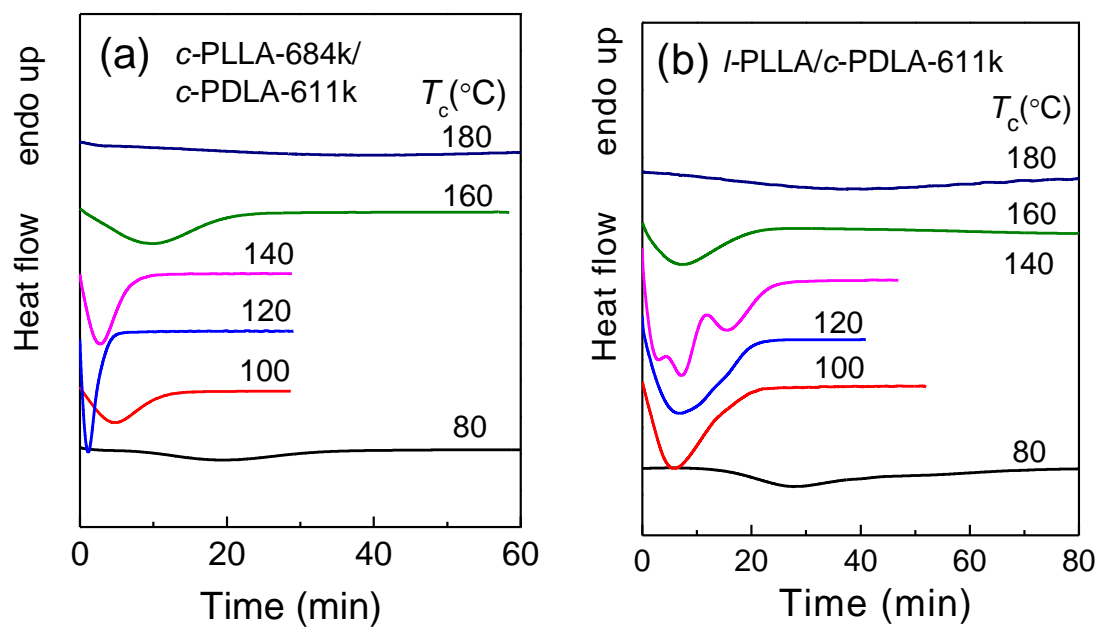

**Figure S2.** DSC curves of PLLA/PDLA racemic blends recorded in isothermal melt-crystallization at different  $T_c$ s: (a) *c*-PLLA-684k/*c*-PDLA-611k, (b) *l*-PLLA/*c*-PDLA-611k.

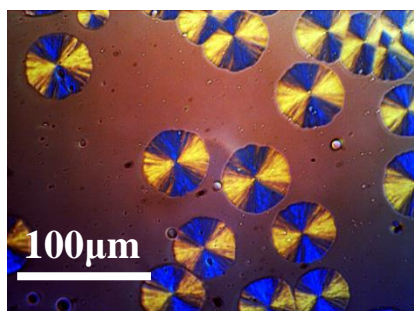

*c*-PLLA-341k/*c*-PDLA-365k

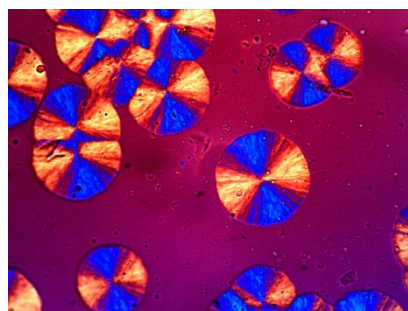

*c*-PLLA-501k/*c*-PDLA-467k

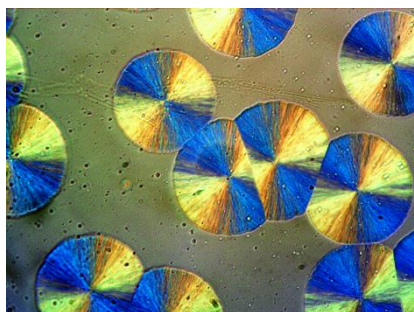

*c*-PLLA-684k/*c*-PDLA-611k

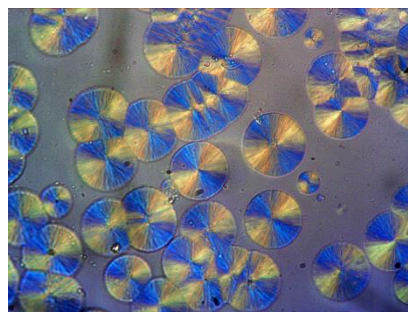

*l*-PLLA/*c*-PDLA-611k

**Figure S3.** POM micrographs of PLLA/PDLA racemic blends recorded in isothermal melt-crystallization at 160 °C.

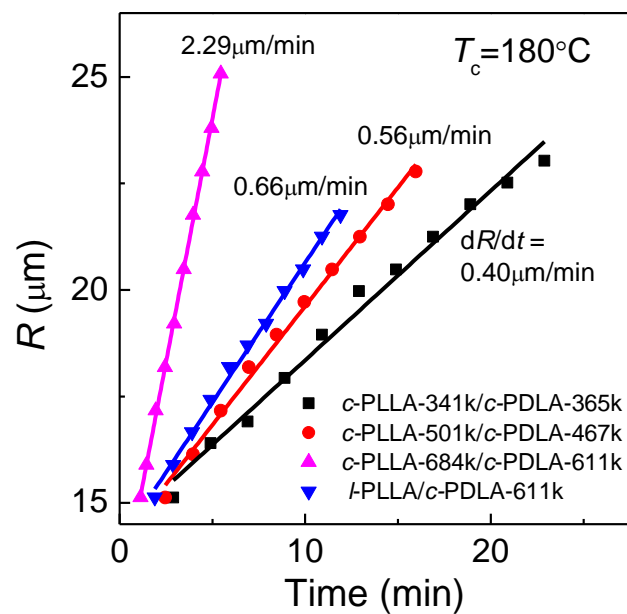

**Figure S4.** Spherulitic radius ( $R$ ) of PLLA/PDLA racemic blends after isothermal melt-crystallization at  $180^\circ\text{C}$  for different time ( $t$ ).

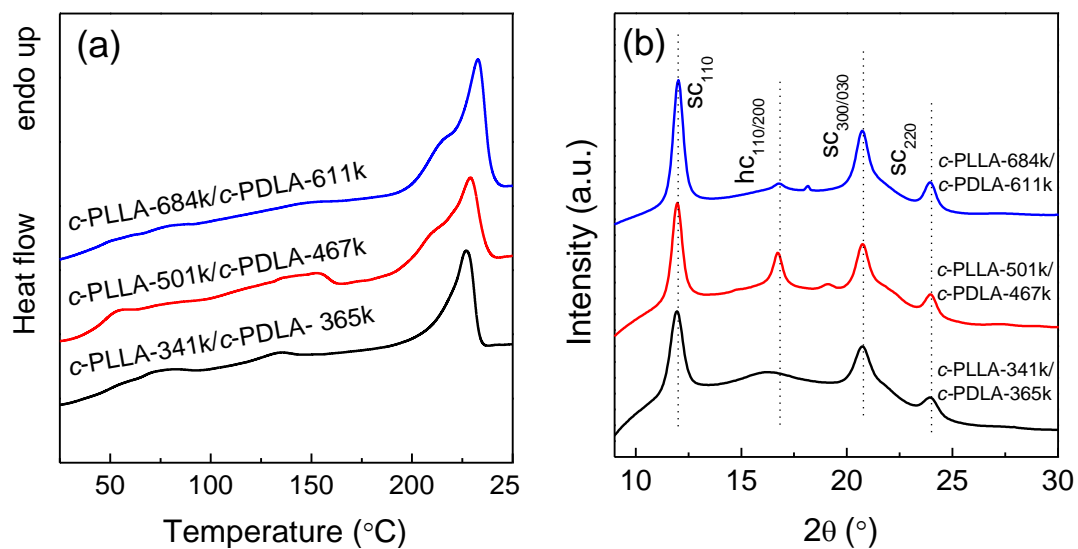

**Figure S5.** (a) DSC heating curves at 10 °C/min and (b) WAXD patterns of solvent-cast comblike PLLA/PDLA racemic blends. The wavelength of X-ray is 0.154 nm. In solvent casting, the blends were dried at 40 °C under vacuum for 24 h after the evaporation of solvent under ambient conditions.

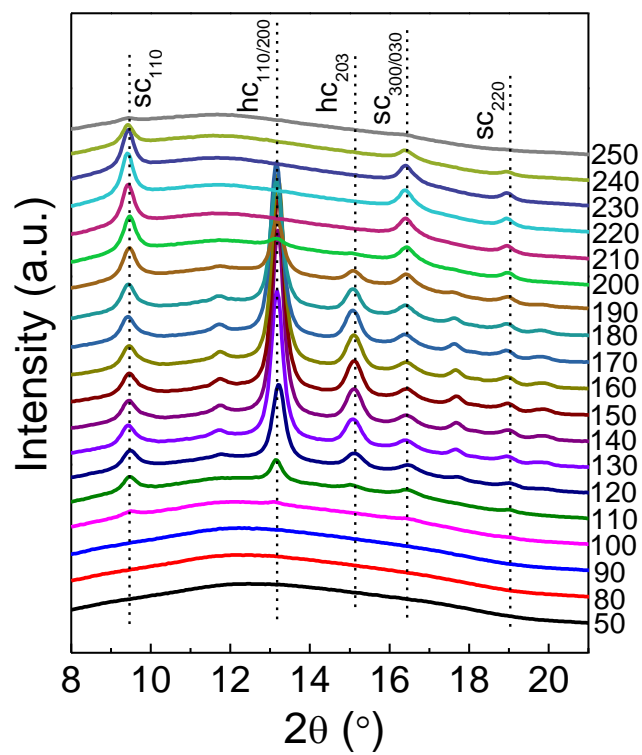

**Figure S6.** Temperature-dependent WAXD patterns of melt-quenched *l*-PLLA/*l*-PDLA blend collected upon heating. The wavelength of X-ray is 0.124 nm.
